# Supplementary material for: Facilitators and Barriers to Healthcare Seeking Behaviour and Antenatal Care Visits Among Pregnant Adolescents in Brunei Darussalam: A Qualitative Study Based on Maternity Health Care Professionals’ Perspectives
Source: Research Square preprint supplement (doi:10.21203/rs.3.rs-6896678/v1), 2025-09-03
Supplement: Supplementary file 1 [file 2acda0bef909c6bbf23ba33a.docx]

INTERVIEW GUIDELINE

(ENGLISH VERSION)

Type of research : phenomenology exploring midwife or doctor perception on health seeking behaviour of pregnant adolescent in Brunei

Type of interview : In-depth semi structured interview

Duration : 45-60 minutes (not more than one hour)

The number of questions : 8

| **Questions** | **Aspects** |
| --- | --- |
| In your own words, what do you understand about the term ‘pregnant adolescent’? | Individual |
| Can you share your experience in giving antenatal care to pregnant adolescents at your workplace? In terms of behaviour, knowledge of pregnancy, and their expectation of ANC, | Individual |
| What are the barriers or challenges in the provision of ANC to pregnant adolescents related to seeking health care? | Individual, Family, Community, System |
| From your experience in caring for pregnant adolescents, do any of the women comply with appointments that have been scheduled by the clinic? | individual |
| Based on your experience, if the women have any problems during their pregnancy, how do they approach health care professionals? | Individual |
| What factors could influence healthcare-seeking behaviour and ANC visits among pregnant adolescents? | Community and Social |
| What do you think about the current facilities offered to pregnant adolescents in Brunei? | Government /system |
| According to the literature, the majority of findings have revealed that pregnant adolescent feels the health care professional and community, which may discourage them from seeking health care, are stigmatizing them. What do you think about this perception? | Family, Community and Social |
| Can you share any suggestions or strategies to improve the current services offered to pregnant adolescents in Brunei? | Community and Social |
